# Supplementary material for: A modified endocardial radiofrequency ablation approach for hypertrophic obstructive cardiomyopathy guided by transthoracic echocardiography: a case series
Source: PubMed Central journal article supplement — Ann Transl Med. 2021 Jun;9(12):1006. doi: 10.21037/atm-21-2783 (PMC8267310; doi:10.21037/atm-21-2783), 2021-06
Supplement: atm-09-12-1006-dss.pdf [file atm-09-12-1006-dss.pdf]

## Data Sharing Statement

|                     |                                                                                                                                                     |                                                                                                                                  |
|---------------------|-----------------------------------------------------------------------------------------------------------------------------------------------------|----------------------------------------------------------------------------------------------------------------------------------|
| <b>Article Info</b> | <a href="https://dx.doi.org/10.21037/atm-21-2783">https://dx.doi.org/10.21037/atm-21-2783</a>                                                       |                                                                                                                                  |
| <b>Item</b>         | <b>Question</b>                                                                                                                                     | <b>Authors' Response<br/>(place "-" if not applicable)</b>                                                                       |
| 1                   | Would you like to share data collected for your study to others?                                                                                    | NO.                                                                                                                              |
| 2                   | If not, would you like to share the reason for your decision?                                                                                       | The number of cases was small and the follow-up period was short, almost all the data have been showed in the text/table/figure. |
| 3                   | What data in particular will be shared?                                                                                                             | -                                                                                                                                |
| 4                   | Any other documents will be shared? Such as study protocol, statistical analysis plan, informed consent form, clinical study report, analytic code. | -                                                                                                                                |
| 5                   | When will data availability begin?                                                                                                                  | -                                                                                                                                |
| 6                   | When will data availability end?                                                                                                                    | -                                                                                                                                |
| 7                   | To whom will you share the data?                                                                                                                    | -                                                                                                                                |
| 8                   | For what type of analysis or purpose?                                                                                                               | -                                                                                                                                |
| 9                   | How or where can the data/documents be obtained?                                                                                                    | -                                                                                                                                |
| 10                  | Any other restrictions?                                                                                                                             | -                                                                                                                                |
